# Supplementary material for: Effect of BCG vaccination against Mycobacterium tuberculosis infection in adult Brazilian health-care workers: a nested clinical trial
Source: PubMed Central journal article supplement (PMC11111441; doi:10.1016/s1473-3099(23)00818-6), 2024-06
Supplement: mmc1.pdf [file mmc1.pdf]

# THE LANCET

## Infectious Diseases

### Supplementary appendix 1

This translation in Portuguese was submitted by the authors and we reproduce it as supplied. It has not been peer reviewed. *The Lancet's* editorial processes have only been applied to the original in English, which should serve as reference for this manuscript.

Esta tradução em português foi submetida pelos autores e nós não fizemos quaisquer alterações. Esta versão não foi revista por pares. O processo editorial do The Lancet só foi aplicado à versão original em inglês, que deve servir como referência para este artigo.

Supplement to: dos Santos PCP, Messina NL, de Oliveira RD, et al. Effect of BCG vaccination against *Mycobacterium tuberculosis* infection in adult Brazilian health-care workers: a nested clinical trial. *Lancet Infect Dis* 2024; published online Feb 26. [https://doi.org/10.1016/S1473-3099\(23\)00818-6](https://doi.org/10.1016/S1473-3099(23)00818-6).

## **Efeito da vacina BCG contra a infecção por *Mycobacterium tuberculosis* em trabalhadores de saúde adultos brasileiros: um ensaio clínico aninhado**

### **Resumo**

**Contexto:** A eficácia da vacina Bacillus Calmette-Guérin (BCG) para a tuberculose pulmonar em adultos permanece incerta. Neste estudo, objetivamos avaliar o efeito da vacinação com BCG-Dinamarca para prevenir a conversão inicial e sustentada do ensaio de liberação de interferon-gama em trabalhadores de saúde brasileiros.

**Métodos:** Este subestudo é parte de um ensaio clínico randomizado, o estudo BRACE (NCT04327206), que avaliou a vacina BCG-Dinamarca em trabalhadores de saúde brasileiros (com idade  $\geq 18$  anos) de Manaus, Campo Grande e Rio de Janeiro, sem considerar se já haviam sido vacinados com BCG. Foram excluídos os participantes com contraindicações à vacina BCG, tratamento prolongado ( $>1$  mês) com medicamentos antituberculose, reações adversas prévias ao BCG, vacinação recente com BCG ou não adesão às intervenções propostas. Os elegíveis foram alocados aleatoriamente (1:1) para receber uma injeção intradérmica de 0,1 mL de BCG-Dinamarca [cepa dinamarquesa 1331; AJ Vacinas, Copenhague] ou de solução salina a 0,9%, usando um sistema web de randomização em blocos de tamanhos variados (2, 4 ou 6), estratificado por local do estudo, faixa etária ( $<40$ ,  $\geq 40$  a  $<60$ ,  $\geq 60$  anos) e comorbidades (diabetes, doença respiratória crônica, condição cardíaca e hipertensão). Seringas obliteradas evitaram a revelação das atribuições do grupo. O teste QuantiFERON-TB Gold Plus (QFT) Plus (Qiagen; Hilden, Alemanha) foi usado para medir a infecção por tuberculose nas avaliações basais e de 12 meses. O desfecho primário de eficácia foi a conversão do QFT Plus ( $\geq 0,35$  UI/mL) em 12 meses nos participantes com resultado basal negativo ( $<0,35$  UI/mL).

**Resultados:** Entre 07 de outubro de 2020 e 12 de abril de 2021, 1985 (77,3%) dos 2568 participantes foram elegíveis para a avaliação QFT Plus de 12 meses e foram incluídos neste subestudo; 996 (50,2%) dos 1985 estavam no grupo BCG e 989 (49,8%) estavam no grupo placebo. No geral, 1475 (74,3%) dos 1985 participantes eram mulheres e 510 (25,7%) eram homens, e a idade média era de 39 anos (IQR 32–47). Durante os primeiros 12 meses, a conversão QFT Plus ocorreu em 66 (3,3%) dos 1985 participantes, sem diferenças significativas por local do estudo ( $p=0,897$ ). Especificamente, 34 (3,4%) dos 996 participantes tiveram conversão QFT inicial no grupo BCG em comparação com 32 (3,2%) dos 989 no grupo placebo (razão de risco 1,09 [IC 95% 0,67–1,77];  $p=0,791$ ).

**Interpretação:** A vacinação com BCG-Dinamarca não reduziu o risco de conversão inicial do QFT Plus em trabalhadores de saúde brasileiros. Este achado destaca a necessidade de melhor compreender a prevenção da tuberculose em populações de alto risco.

**Financiamento:** A Bill & Melinda Gates Foundation, a Minderoo Foundation, a Sarah and Lachlan Murdoch, a Royal Children's Hospital Foundation, a Health Services Union NSW, a Peter Sowerby Foundation, a SA Health, a Insurance Advisernet Foundation, a NAB Foundation, a

Calvert-Jones Foundation, a Modara Pines Charitable Foundation, a United Health Group Foundation, a Epworth Healthcare, e doadores individuais.
