# Supplementary material for: Effect of BCG vaccination against Mycobacterium tuberculosis infection in adult Brazilian health-care workers: a nested clinical trial
Source: PubMed Central journal article supplement (PMC11111441; doi:10.1016/s1473-3099(23)00818-6), 2024-06
Supplement: mmc2.pdf [file mmc2.pdf]

# THE LANCET

## Infectious Diseases

### Supplementary appendix 2

This appendix formed part of the original submission and has been peer reviewed. We post it as supplied by the authors.

Supplement to: dos Santos PCP, Messina NL, de Oliveira RD, et al. Effect of BCG vaccination against *Mycobacterium tuberculosis* infection in adult Brazilian health-care workers: a nested clinical trial. *Lancet Infect Dis* 2024; published online Feb 26. [https://doi.org/10.1016/S1473-3099\(23\)00818-6](https://doi.org/10.1016/S1473-3099(23)00818-6).

# Appendix to Effect of BCG vaccination against *Mycobacterium tuberculosis* infection in adult Brazilian health-care workers: a nested clinical trial

Paulo Cesar Pereira dos Santos, M.S.<sup>1</sup>, Nicole Messina<sup>2,3</sup>, Ph.D., Roberto Dias de Oliveira, Ph.D.<sup>4,5</sup>, Patricia Vieira da Silva, Ph.D.<sup>1</sup>, Marco Antonio Moreira Puga, Ph.D.<sup>1</sup>, Margareth Dalcolmo, Ph.D.<sup>6,7</sup>, Glauce dos Santos, B.Sc.<sup>6,7</sup>, Marcus Vinícius Guimarães de Lacerda, Ph.D.<sup>8,9</sup>, Bruno Araújo Jardim, M.Sc.<sup>8</sup>, Fernando Fonseca de Almeida e Val, Ph.D.<sup>8</sup>, Nigel Curtis, Ph.D.<sup>2,3,10</sup>, Jason Andrews, M.D.<sup>11\*</sup>, Julio Croda, Ph.D.<sup>1,12,13\*</sup>

\* These authors contributed equally.

1. Universidade Federal de Mato Grosso do Sul - UFMS, Campo Grande, MS, Brazil.
2. Infectious Diseases Group, Murdoch Children’s Research Institute, Parkville, Victoria, Australia.
3. Department of Paediatrics, The University of Melbourne, Parkville, Victoria, Australia.
4. Universidade Estadual de Mato Grosso do Sul, Dourados, MS, Brazil.
5. Programa de Pós-graduação em Ciências da Saúde, Universidade Federal da Grande Dourados, Dourados, MS, Brazil.
6. Centro de Referência Professor Hélio Fraga, Fundação Oswaldo Cruz, Rio de Janeiro, Brazil
7. Pontifícia Universidade Católica do Rio de Janeiro, Rio de Janeiro, Brazil.
8. Fundação de Medicina Tropical Doutor Heitor Vieira Dourado, Manaus, Brazil.
9. Instituto Leônidas & Maria Deane, Oswaldo Cruz Foundation Ministry of Health, Amazonas, Brazil.
10. Infectious Diseases, The Royal Children’s Hospital Melbourne, Parkville, Victoria, Australia.
11. Stanford University School of Medicine, Division of Infectious Diseases and Geographic Medicine, Stanford, CA, United States of America.
12. Fiocruz Mato Grosso do Sul, Fundação Oswaldo Cruz, Campo Grande, MS, Brazil.
13. Department of Epidemiology of Microbial Diseases, Yale School of Public Health, New Haven, CT, USA.

## Table of Contents

|                                                                                                                                                                            |   |
|----------------------------------------------------------------------------------------------------------------------------------------------------------------------------|---|
| Supplementary Results .....                                                                                                                                                | 2 |
| Supplementary Table 1. The primary analysis of QuantiFERON results stratified by study arm in the intention-to-treat population (regardless of Month 12 QFT performed).*   | 2 |
| Supplementary Table 2. The secondary analysis of QuantiFERON results stratified by study arm in the intention-to-treat population (Month 12 QFT available).*               | 3 |
| Supplementary Table 3. The secondary analysis of QuantiFERON results stratified by study arm in the intention-to-treat population (regardless of Month 12 QFT performed).* | 4 |
| Supplementary Table 4. The primary analysis of QuantiFERON results stratified by study arm in the per-protocol population (Month 12 QFT available).*                       | 5 |
| Supplementary Table 5. The primary analysis of QuantiFERON results stratified by study arm in the per-protocol population (regardless of Month 12 QFT performed).*         | 6 |
| Supplementary Table 6. The secondary analysis of QuantiFERON results stratified by study arm in the per-protocol population (Month 12 QFT available).*                     | 7 |
| Supplementary Table 7. The secondary analysis of QuantiFERON results stratified by study arm in the per-protocol population (regardless of Month 12 QFT performed).*       | 8 |

## Supplementary Results

**Supplementary Table 1. The primary analysis of QuantiFERON results stratified by study arm in the intention-to-treat population (regardless of Month 12 QFT performed).\***

|                                                                                          | BCG group     | Placebo group | RR (95% CI)         | p-value |
|------------------------------------------------------------------------------------------|---------------|---------------|---------------------|---------|
| <b>Primary outcome</b>                                                                   |               |               |                     |         |
| QFT conversion (positivity threshold $\geq 0.35$ IU/mL)                                  | 34/1129 (3.0) | 32/1140 (2.8) | 1.09 (0.66 to 1.77) | 0.727   |
| <b>Secondary outcome</b>                                                                 |               |               |                     |         |
| Sustained conversion (positivity threshold $\geq 0.35$ IU/mL)                            | 15/1129 (1.3) | 19/1140 (1.7) | 0.81 (0.41 to 1.60) | 0.546   |
| <b>Exploratory outcomes</b>                                                              |               |               |                     |         |
| QFT conversion (positivity threshold $\geq 0.70$ IU/mL)                                  | 15/1129 (1.3) | 13/1140 (1.1) | 1.17 (0.56 to 2.51) | 0.671   |
| QFT conversion (positivity threshold $\geq 2.00$ IU/mL)                                  | 6/1129 (0.5)  | 5/1140 (0.4)  | 1.21 (0.37 to 3.95) | 0.757   |
| QFT conversion (positivity threshold $\geq 4.00$ IU/mL)                                  | 2/1129 (0.2)  | 3/1140 (0.3)  | 0.66 (0.11 to 3.97) | 0.654   |
| QFT conversion (baseline QFT $< 0.20$ IU/mL, and positivity threshold $\geq 0.35$ IU/mL) | 22/1078 (2.0) | 23/1093 (2.1) | 0.99 (0.55 to 1.78) | 0.971   |

Data are n/N (%), unless otherwise specified. \*All analyses were done in the intention-to-treat population. QFT=QuantiFERON-TB Gold.

**Supplementary Table 2. The secondary analysis of QuantiFERON results stratified by study arm in the intention-to-treat population (Month 12 QFT available).\***

|                                                                                          | <b>BCG group</b> | <b>Placebo group</b> | <b>RR (95% CI)</b>  | <b>p-value</b> |
|------------------------------------------------------------------------------------------|------------------|----------------------|---------------------|----------------|
| <b>Primary outcome</b>                                                                   |                  |                      |                     |                |
| QFT conversion (positivity threshold $\geq 0.35$ IU/mL)                                  | 34/996 (3.4)     | 32/989 (3.2)         | 1.05 (0.65 to 1.71) | 0.833          |
| <b>Secondary outcome</b>                                                                 |                  |                      |                     |                |
| Sustained conversion (positivity threshold $\geq 0.35$ IU/mL)                            | 15/996 (1.5)     | 19/989 (1.9)         | 0.79 (0.40 to 1.56) | 0.490          |
| <b>Exploratory outcomes</b>                                                              |                  |                      |                     |                |
| QFT conversion (positivity threshold $\geq 0.70$ IU/mL)                                  | 15/996 (1.5)     | 13/989 (1.3)         | 1.14 (0.54 to 2.40) | 0.727          |
| QFT conversion (positivity threshold $\geq 2.00$ IU/mL)                                  | 6/996 (0.6)      | 5/989 (0.5)          | 1.14 (0.35 to 3.75) | 0.825          |
| QFT conversion (positivity threshold $\geq 4.00$ IU/mL)                                  | 2/996 (0.2)      | 3/989 (0.3)          | 0.62 (0.10 to 3.73) | 0.611          |
| QFT conversion (baseline QFT $< 0.20$ IU/mL, and positivity threshold $\geq 0.35$ IU/mL) | 22/957 (2.3)     | 23/950 (2.4)         | 0.95 (0.53 to 1.72) | 0.873          |

Data are n/N (%), unless otherwise specified. \*All analyses were done in the intention-to-treat population. QFT=QuantiFERON-TB Gold.

**Supplementary Table 3. The secondary analysis of QuantiFERON results stratified by study arm in the intention-to-treat population (regardless of Month 12 QFT performed).\***

|                                                                                          | <b>BCG group</b> | <b>Placebo group</b> | <b>RR (95% CI)</b>  | <b>p-value</b> |
|------------------------------------------------------------------------------------------|------------------|----------------------|---------------------|----------------|
| <b>Primary outcome</b>                                                                   |                  |                      |                     |                |
| QFT conversion (positivity threshold $\geq 0.35$ IU/mL)                                  | 34/1129 (3.0)    | 32/1140 (2.8)        | 1.08 (0.66 to 1.75) | 0.762          |
| <b>Secondary outcome</b>                                                                 |                  |                      |                     |                |
| Sustained conversion (positivity threshold $\geq 0.35$ IU/mL)                            | 15/1129 (1.3)    | 19/1140 (1.7)        | 0.81 (0.41 to 1.60) | 0.551          |
| <b>Exploratory outcomes</b>                                                              |                  |                      |                     |                |
| QFT conversion (positivity threshold $\geq 0.70$ IU/mL)                                  | 15/1129 (1.3)    | 13/1140 (1.1)        | 1.17 (0.56 to 2.46) | 0.681          |
| QFT conversion (positivity threshold $\geq 2.00$ IU/mL)                                  | 6/1129 (0.5)     | 5/1140 (0.4)         | 1.17 (0.36 to 3.85) | 0.792          |
| QFT conversion (positivity threshold $\geq 4.00$ IU/mL)                                  | 2/1129 (0.2)     | 3/1140 (0.3)         | 0.64 (0.11 to 3.86) | 0.634          |
| QFT conversion (baseline QFT $< 0.20$ IU/mL, and positivity threshold $\geq 0.35$ IU/mL) | 22/1078 (2.0)    | 23/1093 (2.1)        | 0.98 (0.54 to 1.76) | 0.940          |

Data are n/N (%), unless otherwise specified. \*All analyses were done in the intention-to-treat population. QFT=QuantiFERON-TB Gold.

**Supplementary Table 4. The primary analysis of QuantiFERON results stratified by study arm in the per-protocol population (Month 12 QFT available).\***

|                                                                                          | <b>BCG group</b> | <b>Placebo group</b> | <b>RR (95% CI)</b>  | <b>p-value</b> |
|------------------------------------------------------------------------------------------|------------------|----------------------|---------------------|----------------|
| <b>Primary outcome</b>                                                                   |                  |                      |                     |                |
| QFT conversion (positivity threshold $\geq 0.35$ IU/mL)                                  | 34/995 (3.4)     | 32/985 (3.2)         | 1.06 (0.66 to 1.73) | 0.799          |
| <b>Secondary outcome</b>                                                                 |                  |                      |                     |                |
| Sustained conversion (positivity threshold $\geq 0.35$ IU/mL)                            | 15/995 (1.5)     | 19/985 (1.9)         | 0.80 (0.40 to 1.57) | 0.504          |
| <b>Exploratory outcomes</b>                                                              |                  |                      |                     |                |
| QFT conversion (positivity threshold $\geq 0.70$ IU/mL)                                  | 15/995 (1.5)     | 13/985 (1.3)         | 1.15 (0.54 to 2.45) | 0.716          |
| QFT conversion (positivity threshold $\geq 2.00$ IU/mL)                                  | 6/995 (0.6)      | 5/985 (0.5)          | 1.17 (0.36 to 3.85) | 0.790          |
| QFT conversion (positivity threshold $\geq 4.00$ IU/mL)                                  | 2/995 (0.2)      | 3/985 (0.3)          | 0.64 (0.11 to 3.84) | 0.632          |
| QFT conversion (baseline QFT $< 0.20$ IU/mL, and positivity threshold $\geq 0.35$ IU/mL) | 22/956 (2.3)     | 23/946 (2.4)         | 0.96 (0.53 to 1.73) | 0.896          |

Data are n/N (%), unless otherwise specified. \*All analyses were done in the per-protocol population. QFT=QuantiFERON-TB Gold.

**Supplementary Table 5. The primary analysis of QuantiFERON results stratified by study arm in the per-protocol population (regardless of Month 12 QFT performed).\***

|                                                                                          | <b>BCG group</b> | <b>Placebo group</b> | <b>RR (95% CI)</b>  | <b>p-value</b> |
|------------------------------------------------------------------------------------------|------------------|----------------------|---------------------|----------------|
| <b>Primary outcome</b>                                                                   |                  |                      |                     |                |
| QFT conversion (positivity threshold $\geq 0.35$ IU/mL)                                  | 34/1127 (3.0)    | 32/1136 (2.8)        | 1.09 (0.67 to 1.77) | 0.731          |
| <b>Secondary outcome</b>                                                                 |                  |                      |                     |                |
| Sustained conversion (positivity threshold $\geq 0.35$ IU/mL)                            | 15/1127 (1.3)    | 19/1136 (1.7)        | 0.81 (0.41 to 1.60) | 0.542          |
| <b>Exploratory outcomes</b>                                                              |                  |                      |                     |                |
| QFT conversion (positivity threshold $\geq 0.70$ IU/mL)                                  | 15/1127 (1.3)    | 13/1136 (1.1)        | 1.17 (0.56 to 2.50) | 0.672          |
| QFT conversion (positivity threshold $\geq 2.00$ IU/mL)                                  | 6/1127 (0.5)     | 5/1136 (0.4)         | 1.20 (0.37 to 3.95) | 0.758          |
| QFT conversion (positivity threshold $\geq 4.00$ IU/mL)                                  | 2/1127 (0.2)     | 3/1136 (0.3)         | 0.66 (0.11 to 3.96) | 0.654          |
| QFT conversion (baseline QFT $< 0.20$ IU/mL, and positivity threshold $\geq 0.35$ IU/mL) | 22/1076 (0.2)    | 23/1089 (0.3)        | 0.99 (0.55 to 1.78) | 0.968          |

Data are n/N (%), unless otherwise specified. \*All analyses were done in the per-protocol population. QFT=QuantiFERON-TB Gold.

**Supplementary Table 6. The secondary analysis of QuantiFERON results stratified by study arm in the per-protocol population (Month 12 QFT available).\***

|                                                                                          | <b>BCG group</b> | <b>Placebo group</b> | <b>RR (95% CI)</b>  | <b>p-value</b> |
|------------------------------------------------------------------------------------------|------------------|----------------------|---------------------|----------------|
| <b>Primary outcome</b>                                                                   |                  |                      |                     |                |
| QFT conversion (positivity threshold $\geq 0.35$ IU/mL)                                  | 34/995 (3.4)     | 32/985 (3.2)         | 1.05 (0.65 to 1.71) | 0.842          |
| <b>Secondary outcome</b>                                                                 |                  |                      |                     |                |
| Sustained conversion (positivity threshold $\geq 0.35$ IU/mL)                            | 15/995 (1.5)     | 19/985 (1.9)         | 0.79 (0.40 to 1.55) | 0.339          |
| <b>Exploratory outcomes</b>                                                              |                  |                      |                     |                |
| QFT conversion (positivity threshold $\geq 0.70$ IU/mL)                                  | 15/995 (1.5)     | 13/985 (1.3)         | 1.14 (0.54 to 2.40) | 0.731          |
| QFT conversion (positivity threshold $\geq 2.00$ IU/mL)                                  | 6/995 (0.6)      | 5/985 (0.5)          | 1.14 (0.35 to 3.74) | 0.827          |
| QFT conversion (positivity threshold $\geq 4.00$ IU/mL)                                  | 2/995 (0.2)      | 3/985 (0.3)          | 0.62 (0.10 to 3.72) | 0.610          |
| QFT conversion (baseline QFT $< 0.20$ IU/mL, and positivity threshold $\geq 0.35$ IU/mL) | 22/956 (2.3)     | 23/946 (2.4)         | 0.95 (0.53 to 1.71) | 0.867          |

Data are n/N (%), unless otherwise specified. \*All analyses were done in the per-protocol population. QFT=QuantiFERON-TB Gold.



**Supplementary Table 7. The secondary analysis of QuantiFERON results stratified by study arm in the per-protocol population (regardless of Month 12 QFT performed).\***

|                                                                                          | <b>BCG group</b> | <b>Placebo group</b> | <b>RR (95% CI)</b>  | <b>p-value</b> |
|------------------------------------------------------------------------------------------|------------------|----------------------|---------------------|----------------|
| <b>Primary outcome</b>                                                                   |                  |                      |                     |                |
| QFT conversion (positivity threshold $\geq 0.35$ IU/mL)                                  | 34/1127 (3.0)    | 32/1136 (2.8)        | 1.08 (0.66 to 1.75) | 0.768          |
| <b>Secondary outcome</b>                                                                 |                  |                      |                     |                |
| Sustained conversion (positivity threshold $\geq 0.35$ IU/mL)                            | 15/1127 (1.3)    | 19/1136 (1.7)        | 0.81 (0.41 to 1.60) | 0.545          |
| <b>Exploratory outcomes</b>                                                              |                  |                      |                     |                |
| QFT conversion (positivity threshold $\geq 0.70$ IU/mL)                                  | 15/1127 (1.3)    | 13/1136 (1.1)        | 1.17 (0.56 to 2.46) | 0.682          |
| QFT conversion (positivity threshold $\geq 2.00$ IU/mL)                                  | 6/1127 (0.5)     | 5/1136 (0.4)         | 1.17 (0.36 to 3.84) | 0.794          |
| QFT conversion (positivity threshold $\geq 4.00$ IU/mL)                                  | 2/1127 (0.2)     | 3/1136 (0.3)         | 0.64 (0.11 to 3.85) | 0.633          |
| QFT conversion (baseline QFT $< 0.20$ IU/mL, and positivity threshold $\geq 0.35$ IU/mL) | 22/1076 (0.2)    | 23/1089 (0.3)        | 0.98 (0.54 to 1.76) | 0.936          |

Data are n/N (%), unless otherwise specified. \*All analyses were done in the per-protocol population. QFT=QuantiFERON-TB Gold.
